# Supplementary material for: Suicidal ideation in relation to disordered eating, body size and weight perception: a cross-sectional study of a Norwegian adolescent population: the HUNT Study
Source: PubMed Central journal article supplement — BMJ Open. 2019 Jul 27;9(7):e029809. doi: 10.1136/bmjopen-2019-029809 (PMC6661666; doi:10.1136/bmjopen-2019-029809), 2019-07-27
Supplement: bmjopen-2019-029809supp001.pdf [file bmjopen-2019-029809supp001.pdf]

**Supplementary table 1. Distribution of body size perception in each BMI category in boys and girls; Young HUNT1(YH1) and Young HUNT3(YH3):**

|                             | YH1 boys(n=1834) |               |                  |                | YH1 girls(n=1845) |               |                  |                |
|-----------------------------|------------------|---------------|------------------|----------------|-------------------|---------------|------------------|----------------|
|                             | Obese(%)         | Overweight(%) | Normal weight(%) | Underweight(%) | Obese(%)          | Overweight(%) | Normal weight(%) | Underweight(%) |
| <b>Body size perception</b> |                  |               |                  |                |                   |               |                  |                |
| Very fat                    | 11(2)            | 8(3.29)       | 2(0.14)          | 0              | 23(35.93)         | 19(7.28)      | 9(0.63)          | 1(1)           |
| Quite fat                   | 40(72.73)        | 139(57.20)    | 113(7.81)        | 1(1.12)        | 38(59.38)         | 182(69.73)    | 311(21.9)        | 1(1)           |
| Like others                 | 4(7.27)          | 94(38.68)     | 967(66.83)       | 19(21.35)      | 3(4.69)           | 59(22.61)     | 948(66.76)       | 26(26)         |
| Quite thin                  | 0                | 2(0.82)       | 354(24.46)       | 59(66.29)      | 0                 | 1(0.38)       | 146(10.28)       | 66(66)         |
| Very thin                   | 0                | 0             | 11(0.76)         | 10(11.24)      | 0                 | 0             | 6(0.42)          | 6(6)           |
| <b>Total</b>                | <b>55</b>        | <b>243</b>    | <b>1447</b>      | <b>89</b>      | <b>64</b>         | <b>261</b>    | <b>1420</b>      | <b>100</b>     |
|                             | YH3 boys(n=1358) |               |                  |                | YH3 girls(n=1430) |               |                  |                |
|                             | Obese(%)         | Overweight(%) | Normal weight(%) | Underweight(%) | Obese(%)          | Overweight(%) | Normal weight(%) | Underweight(%) |
| <b>Body size perception</b> |                  |               |                  |                |                   |               |                  |                |
| Very fat                    | 8(8.60)          | 1(0.37)       | 6(0.64)          | 0              | 16(20.78)         | 16(5.56)      | 8(0.79)          | 0              |
| Quite fat                   | 72(77.42)        | 104(38.10)    | 64(6.79)         | 0              | 55(71.43)         | 158(54.86)    | 167(16.55)       | 0              |
| Like others                 | 13(13.98)        | 167(61.17)    | 611(64.79)       | 5(10.20)       | 6(7.79)           | 113(39.24)    | 676(67.00)       | 15(26.79)      |
| Quite thin                  | 0                | 0             | 245(25.98)       | 33(67.35)      | 0                 | 0             | 154(15.26)       | 34(60.71)      |
| Very thin                   | 0                | 1(0.37)       | 17(1.80)         | 11(22.45)      | 0                 | 1()           | 4(0.40)          | 7(12.5)        |
| <b>Total</b>                | <b>93</b>        | <b>273</b>    | <b>943</b>       | <b>49</b>      | <b>77</b>         | <b>288</b>    | <b>1009</b>      | <b>56</b>      |

Weight categories are calculated according to Cole et al. 2000 and Cole et al. 2007.
